# Supplementary material
Source: MDPI journal article supplement (https://www.mdpi.com/2674-0710/2/1/1)
Supplement: s1 [file s1 › venereology-2031541-supplementary.pdf]

## Supplementary Materials

### Morisky Medication Adherence Scale (MMAS)

Please answer each question based on your personal experience with your medications. Note that there is not right or wrong answer. (Please **circle** your answer below)

|                                                                                                                                                                                    |                                                                         |                       |
|------------------------------------------------------------------------------------------------------------------------------------------------------------------------------------|-------------------------------------------------------------------------|-----------------------|
| 1. Do you sometimes forget to take your medications?                                                                                                                               | NO                                                                      | YES                   |
| 2. People sometimes miss taking their medications for reasons other than forgetting. Thinking over the past two weeks, were there any days when you did not take your medications? | NO                                                                      | YES                   |
| 3. Have you ever cut back or stopped taking your medications without telling your doctor, because you felt worse when you took it?                                                 | NO                                                                      | YES                   |
| 4. When you travel or leave home, do you sometimes forget to bring along your medications?                                                                                         | NO                                                                      | YES                   |
| 5. Did you take your medications yesterday?                                                                                                                                        | NO                                                                      | YES                   |
| 6. When you feel like your health condition is under control, do you sometimes stop taking you medications?                                                                        | NO                                                                      | YES                   |
| 7. Taking medications every day is a real inconvenience for some people. Do you ever feel hassled about sticking to your treatment plan?                                           | NO                                                                      | YES                   |
| 8. How often do you have difficulty remembering to take all your medications?                                                                                                      | Never/rarely<br>Once in a while<br>Sometimes<br>Usually<br>All the time | 4<br>3<br>2<br>1<br>0 |

## **WHOQOL-HIV BREF**

### **Instructions**

This assessment asks how you feel about your quality of life, health, or other areas of your life. **Please answer all the questions.** If you are unsure about which response to give to a question, **please choose the one** that appears most appropriate. This can often be your first response. Please keep in mind your standards, hopes, pleasures and concerns. We ask that you think about your life **in the last two weeks**. For example, thinking about the last two weeks, a question might ask:

|           |                                       | Not at all | A little | A moderate amount | Very much | Extremely |
|-----------|---------------------------------------|------------|----------|-------------------|-----------|-----------|
| 11 (F5.3) | How well are you able to concentrate? | 1          | 2        | 3                 | 4         | 5         |

You should circle the number that best fits how well are you able to concentrate over the last two weeks. So you would circle the number 4 if you were able to concentrate very much. You would circle number 1 if you were not able to concentrate at all in the last two weeks.

**Please read each question, assess your feelings, and circle the number on the scale for each question that gives the best answer for you.**

|       |                                          | Very poor | Poor | Neither poor nor good | Good | Very good |
|-------|------------------------------------------|-----------|------|-----------------------|------|-----------|
| 1(G1) | How would you rate your quality of life? | 1         | 2    | 3                     | 4    | 5         |

|        |                                         | Very dissatisfied | Dissatisfied | Neither satisfied nor dissatisfied | Satisfied | Very satisfied |
|--------|-----------------------------------------|-------------------|--------------|------------------------------------|-----------|----------------|
| 2 (G4) | How satisfied are you with your health? | 1                 | 2            | 3                                  | 4         | 5              |

The following questions ask about **how much** you have experienced certain things in the last two weeks.

|          |                                                                                            | Not at all | A little | A moderate amount | Very much | An extreme amount |
|----------|--------------------------------------------------------------------------------------------|------------|----------|-------------------|-----------|-------------------|
| 3 (F1.4) | To what extent do you feel that physical pain prevents you from doing what you need to do? | 1          | 2        | 3                 | 4         | 5                 |

|               |                                                                                   |            |          |                   |           |           |
|---------------|-----------------------------------------------------------------------------------|------------|----------|-------------------|-----------|-----------|
| 4<br>(F50.1)  | How much are you bothered by any physical problems related to your HIV infection? | 1          | 2        | 3                 | 4         | 5         |
| 5<br>(F11.3)  | How much do you need any medical treatment to function in your daily life?        | 1          | 2        | 3                 | 4         | 5         |
| 6 (F4.1)      | How much do you enjoy life?                                                       | 1          | 2        | 3                 | 4         | 5         |
| 7<br>(F24.2)  | To what extent do you feel your life to be meaningful?                            | 1          | 2        | 3                 | 4         | 5         |
| 8<br>(F52.2)  | To what extent are you bothered by people blaming you for your HIV status         | 1          | 2        | 3                 | 4         | 5         |
| 9<br>(F53.4)  | How much do you fear the future?                                                  | 1          | 2        | 3                 | 4         | 5         |
| 10<br>(F54.1) | How much do you worry about death?                                                | 1          | 2        | 3                 | 4         | 5         |
|               |                                                                                   | Not at all | A little | A moderate amount | Very much | Extremely |
| 11<br>(F5.3)  | How well are you able to concentrate?                                             | 1          | 2        | 3                 | 4         | 5         |
| 12<br>(F16.1) | How safe do you feel in your daily life?                                          | 1          | 2        | 3                 | 4         | 5         |
| 13<br>(F22.1) | How healthy is your physical environment?                                         | 1          | 2        | 3                 | 4         | 5         |

The following questions ask about **how completely** you experience or were able to do certain things in the last two weeks.

|               |                                                             |            |          |            |        |            |
|---------------|-------------------------------------------------------------|------------|----------|------------|--------|------------|
|               |                                                             | Not at all | A little | Moderately | Mostly | Completely |
| 14<br>(F2.1)  | Do you have enough energy for everyday life?                | 1          | 2        | 3          | 4      | 5          |
| 15<br>(F7.1)  | Are you able to accept your bodily appearance?              | 1          | 2        | 3          | 4      | 5          |
| 16<br>(F18.1) | Have you enough money to meet your needs?                   | 1          | 2        | 3          | 4      | 5          |
| 17<br>(F51.1) | To what extent do you feel accepted by the people you know? | 1          | 2        | 3          | 4      | 5          |

|               |                                                                                |           |      |                       |      |           |
|---------------|--------------------------------------------------------------------------------|-----------|------|-----------------------|------|-----------|
| 18<br>(F20.1) | How available to you is the information that you need in your day-to-day life? | 1         | 2    | 3                     | 4    | 5         |
| 19<br>(F21.1) | To what extent do you have the opportunity for leisure activities?             | 1         | 2    | 3                     | 4    | 5         |
|               |                                                                                | Very poor | Poor | Neither poor nor good | Good | Very good |
| 20<br>(F9.1)  | How well are you able to get around?                                           | 1         | 2    | 3                     | 4    | 5         |

The following questions ask you how **good or satisfied** you have felt about various aspects of your life over the last two weeks.

|               |                                                                                  | Very dissatisfied | Dissatisfied | Neither satisfied nor dissatisfied | Satisfied | Very satisfied |
|---------------|----------------------------------------------------------------------------------|-------------------|--------------|------------------------------------|-----------|----------------|
| 21<br>(F3.3)  | How satisfied are you with your sleep?                                           | 1                 | 2            | 3                                  | 4         | 5              |
| 22<br>(F10.3) | How satisfied are you with your ability to perform your daily living activities? | 1                 | 2            | 3                                  | 4         | 5              |
| 23<br>(F12.4) | How satisfied are you with your capacity for work?                               | 1                 | 2            | 3                                  | 4         | 5              |
| 24<br>(F6.3)  | How satisfied are you with yourself?                                             | 1                 | 2            | 3                                  | 4         | 5              |
| 25<br>(F13.3) | How satisfied are you with your personal relationships?                          | 1                 | 2            | 3                                  | 4         | 5              |
| 26<br>(F15.3) | How satisfied are you with your sex life?                                        | 1                 | 2            | 3                                  | 4         | 5              |
| 27<br>(F14.4) | How satisfied are you with the support you get from your friends?                | 1                 | 2            | 3                                  | 4         | 5              |
| 28<br>(F17.3) | How satisfied are you with the conditions of your living place?                  | 1                 | 2            | 3                                  | 4         | 5              |
| 29<br>(F19.3) | How satisfied are you with your access to health services?                       | 1                 | 2            | 3                                  | 4         | 5              |

|               |                                               |   |   |   |   |   |
|---------------|-----------------------------------------------|---|---|---|---|---|
| 30<br>(F23.3) | How satisfied are you<br>with your transport? | 1 | 2 | 3 | 4 | 5 |
|---------------|-----------------------------------------------|---|---|---|---|---|

The following question refers to **how often** you have felt or experienced certain things in the last two weeks.

|           |                                                                                                |       |        |                |               |        |
|-----------|------------------------------------------------------------------------------------------------|-------|--------|----------------|---------------|--------|
|           |                                                                                                | Never | Seldom | Quite<br>often | Very<br>often | Always |
| 31 (F8.1) | How often do you have negative<br>feelings such as blue mood, despair,<br>anxiety, depression? | 1     | 2      | 3              | 4             | 5      |

Please do you have any further comments?

---



---

**THANK YOU FOR YOUR HELP**
